# Supplementary material
Source: MDPI journal article supplement (https://www.mdpi.com/2308-3417/9/2/28)
Supplement: s1 [file s1]

Table S1. Potentially Inappropriate Medications (PIMs)

|                                                                            |                                                                                                                                                         |
|----------------------------------------------------------------------------|---------------------------------------------------------------------------------------------------------------------------------------------------------|
| <b>Inotropic agents</b>                                                    | Digoxin - Daily dosage > 0,125 mg/day                                                                                                                   |
| <b>Long half-life benzodiazepines</b>                                      | Diazepam, N-demethyl-diazepam, Chlordiazepoxide                                                                                                         |
| <b>Tricyclic Antidepressants</b>                                           | Amitriptyline, Imipramine                                                                                                                               |
| <b>Phenothiazines with piperidine structure</b>                            | Thioridazine                                                                                                                                            |
| <b>Butyrophenones</b>                                                      | Haloperidol                                                                                                                                             |
| <b>Atypical Antipsychotics</b>                                             | Clozapine, Risperidone, Olanzapine, Quetiapine, Aripiprazol, Paliperidone                                                                               |
| <b>Belladonna Alkaloids, semi-synthetic, quaternary ammonium compounds</b> | Butylscopolamine                                                                                                                                        |
| <b>Antihistamines for systemic use</b>                                     | Prometazine, Diphenhydramine                                                                                                                            |
| <b>Antihypertensive agents</b>                                             | Methyldopa; Nifedipine;                                                                                                                                 |
| <b>Antiarrhythmics</b>                                                     | Disopyramide                                                                                                                                            |
| <b><math>\alpha_1</math>-adrenergic blockers</b>                           | Doxazosin, Terazosin                                                                                                                                    |
| <b>Presynaptic <math>\alpha_2</math>-agonists</b>                          | Clonidine                                                                                                                                               |
| <b>Laxatives</b>                                                           | Sodium Picosulfate, Bisacodyl                                                                                                                           |
| <b>Antidiarrheals</b>                                                      | Loperamide                                                                                                                                              |
| <b>Prokinetics</b>                                                         | Metoclopramide                                                                                                                                          |
| <b>Class III antiarrhythmic drugs</b>                                      | Amiodarone                                                                                                                                              |
| <b>NSAIDs (Non-Steroidal anti-inflammatory drugs)</b>                      | Derivates of salicylic acid: Aspirin<br>Derivates of acetic acid: Indometacin<br>Derivates of propionic acid: Naproxene<br>Oxicam: Piroxicam, Tenoxicam |

Table S2. Inappropriate drugs for class and/or dosage

|                              |                                                                                                                                         |
|------------------------------|-----------------------------------------------------------------------------------------------------------------------------------------|
| <b>Benzodiazepines</b>       |                                                                                                                                         |
|                              | Alprazolam > 2 mg day                                                                                                                   |
|                              | Long half-life benzodiazepines (diazepam, chlordiazepoxide, clorazepate, N-demethyl-diazepam, clonidinium-chlordiazepoxide, flurazepam) |
|                              | Lorazepam > 3 mg day                                                                                                                    |
|                              | Meprobamate                                                                                                                             |
|                              | Oxazepam > 60 mg day                                                                                                                    |
|                              | Temazepam > 15 mg die                                                                                                                   |
|                              | Triazolam > 0.25 mg die                                                                                                                 |
| <b>Antihistamines</b>        |                                                                                                                                         |
|                              | Cyproheptadine                                                                                                                          |
|                              | Chlorpheniramine                                                                                                                        |
|                              | Diphenhydramine                                                                                                                         |
|                              | Hydroxyzine                                                                                                                             |
| <b>Stimulating laxatives</b> | Bisacodyl                                                                                                                               |
| <b>Antibiotics</b>           | Nitrofurantoin                                                                                                                          |

Table S3. Interactions = [number of drugs] x ([number of drugs]-1)/2 [1].

| Number of prescribed drugs | Interactions |
|----------------------------|--------------|
| 1                          | 0            |
| 2                          | 1            |
| 3                          | 3            |
| 4                          | 6            |
| 5                          | 10           |
| 6                          | 15           |
| 7                          | 21           |
| 8                          | 28           |
| 9                          | 36           |
| 10                         | 45           |
